# Supplementary material for: Receptor-mediated Uptake of Folic Acid-functionalized Dextran Nanoparticles for Applications in Photodynamic Therapy
Source: PubMed Central journal article supplement (PMC6572481; doi:10.3390/polym11050896), 2019-05-16
Supplement: polymers-11-00896-s001.pdf [file polymers-11-00896-s001.pdf]

# Receptor-mediated Uptake of Folic Acid-functionalized Dextran Nanoparticles for Applications in Photodynamic Therapy

---

**Kathrin Butzbach<sup>1</sup>, Matthias Konhäuser<sup>1</sup>, Matthias Fach<sup>2</sup>, Denise N. Bamberger<sup>1</sup>, Benjamin Breitenbach<sup>1</sup>, Bernd Epe<sup>1</sup> and Peter R. Wich<sup>1,3,4\*</sup>**

<sup>1</sup> Institute of Pharmacy and Biochemistry, Johannes Gutenberg University, Staudingerweg 5, 55128 Mainz, Germany

<sup>2</sup> Department of Health Technology, Technical University of Denmark, Produktionstorvet Building 423, 2800 Lyngby, Denmark

<sup>3</sup> School of Chemical Engineering, University of New South Wales, Science and Engineering Building, Sydney, NSW 2052, Australia

<sup>4</sup> Australian Centre for NanoMedicine, University of New South Wales, Sydney, NSW 2052, Australia

phone: +61 2 9385 4308

email: [p.wich@unsw.edu.au](mailto:p.wich@unsw.edu.au)

web: [www.wichlab.com](http://www.wichlab.com)

# Supporting Information

## NMR Spectroscopy

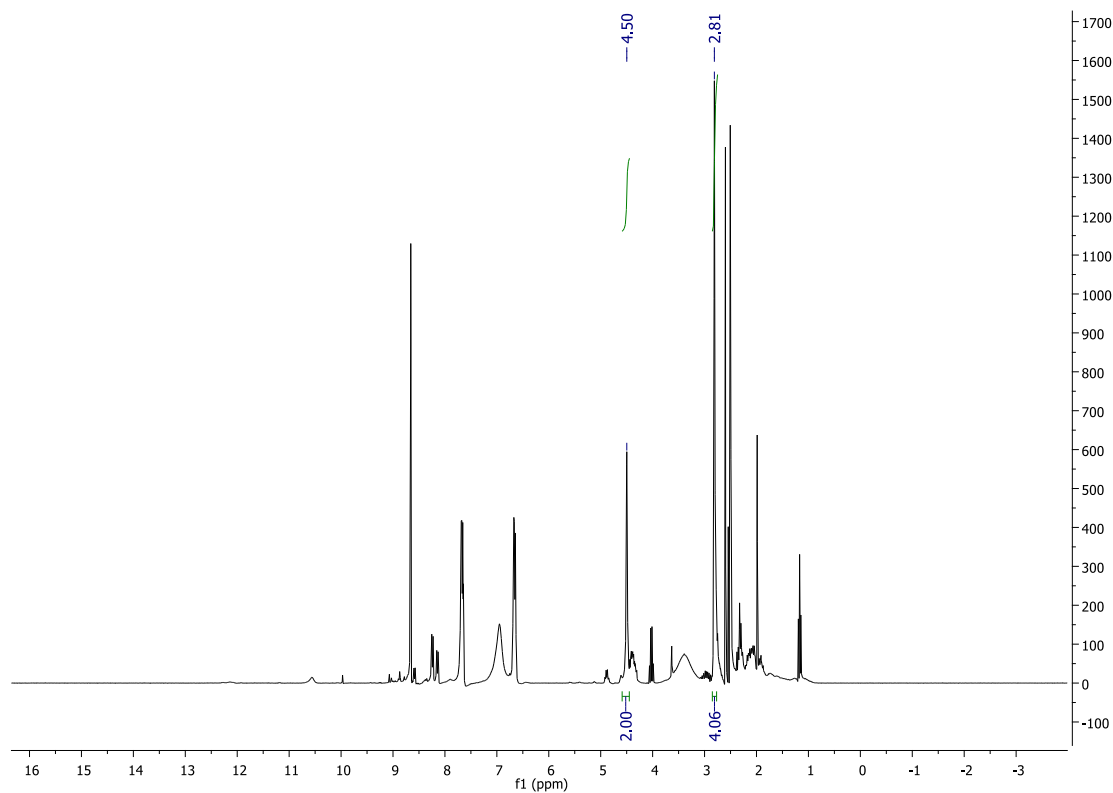

Figure S1: FA-NHS  $^1\text{H-NMR}$  (300 MHz,  $\text{DMSO-}d_6$ )

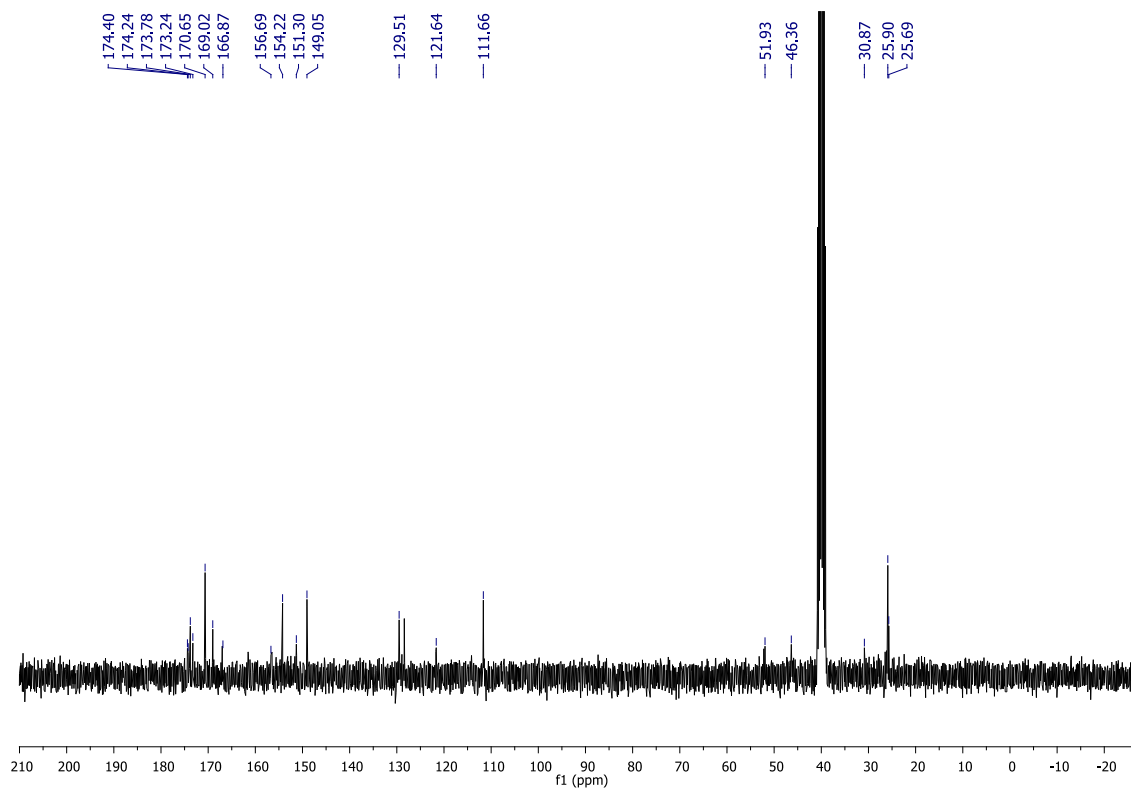

Figure S2: FA-NHS  $^{13}\text{C-NMR}$  (75 MHz,  $\text{DMSO-}d_6$ )

### *Determination of Nanoparticle Size*

Nanoparticle size was determined by dynamic light scattering (DLS) with a Malvern Zetasizer Nano ZS instrument. Evaluation of the data was performed with the Zetasizer software 6.20 and Mark-Houwink parameters. Empty and TPP-loaded Sp-Ac-DEX particles were suspended in PBS (filtered 0.22  $\mu\text{m}$ ) at concentrations of approx.  $0.25 \mu\text{g}\cdot\text{mL}^{-1}$  and suspensions were sonicated as well as vortexed thoroughly for 20 seconds before each measurement. Each measurement consisted of 12 runs and was repeated three times.

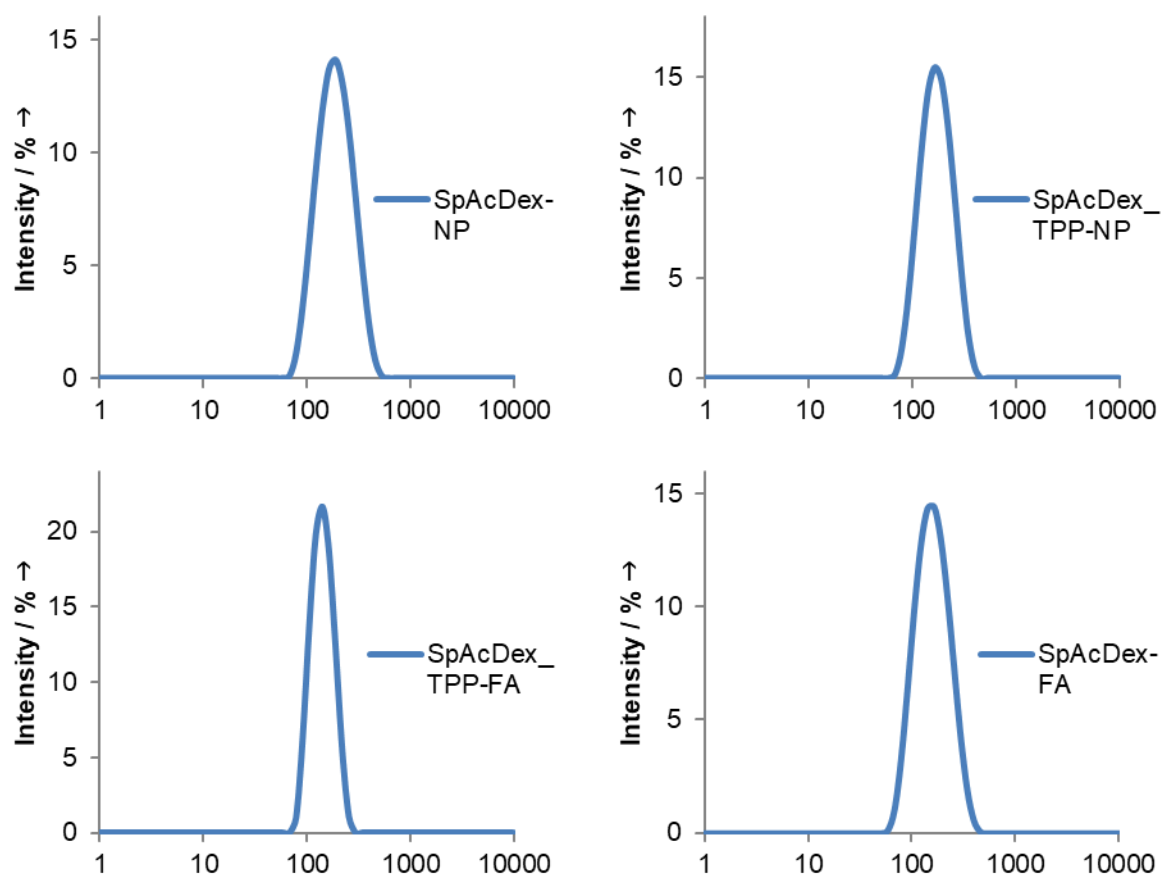

**Figure S3:** Nanoparticle size (diameter) of different SpAcDex particle types. Intensity describes the particle size distribution within the sample, depending on their scattering intensities.

*Fluorescence Microscopy*

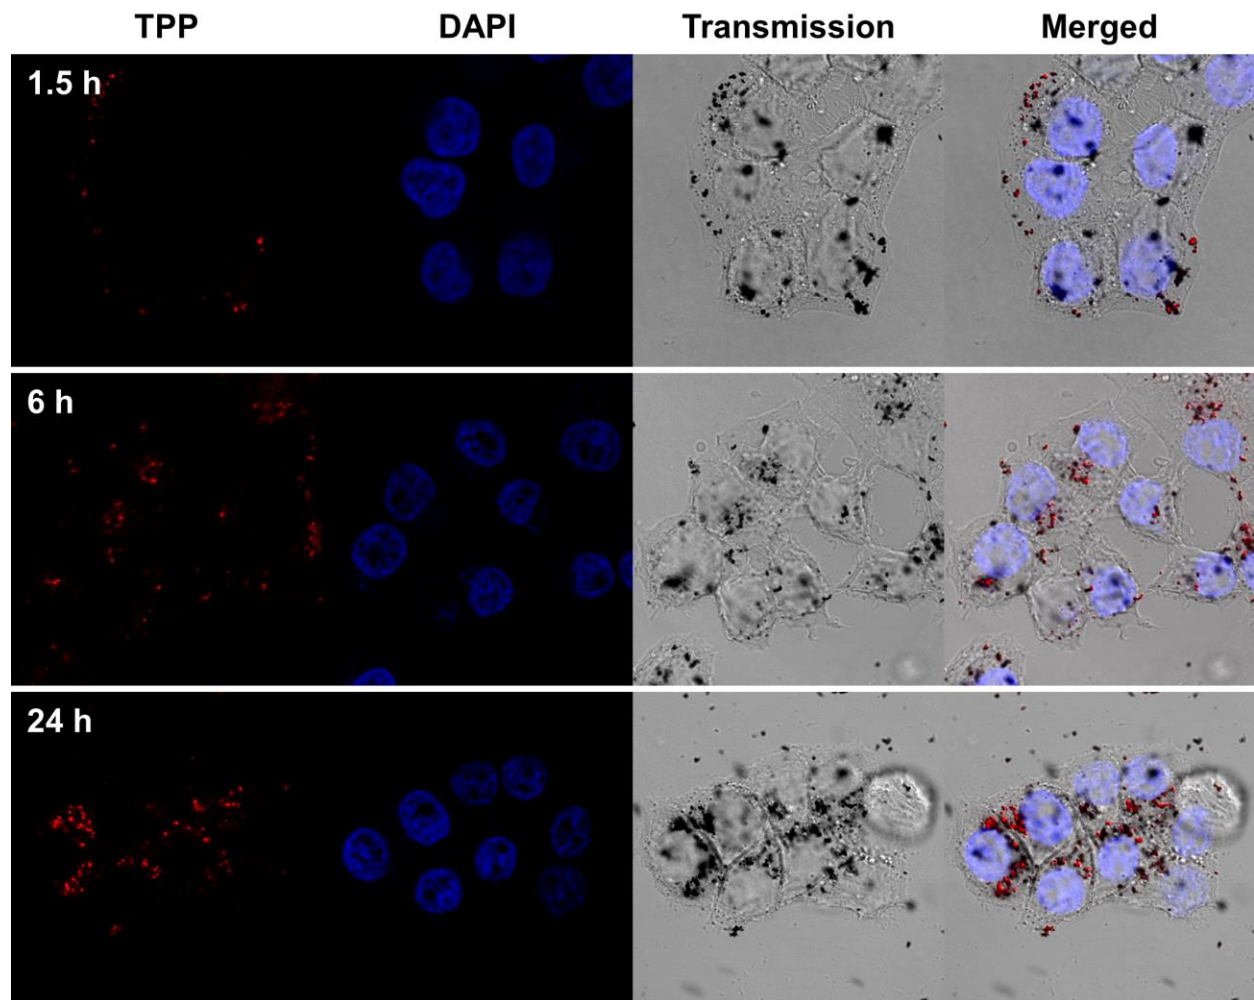

**Figure S4:** “Naked” SpAcDex(TPP) without FA competition

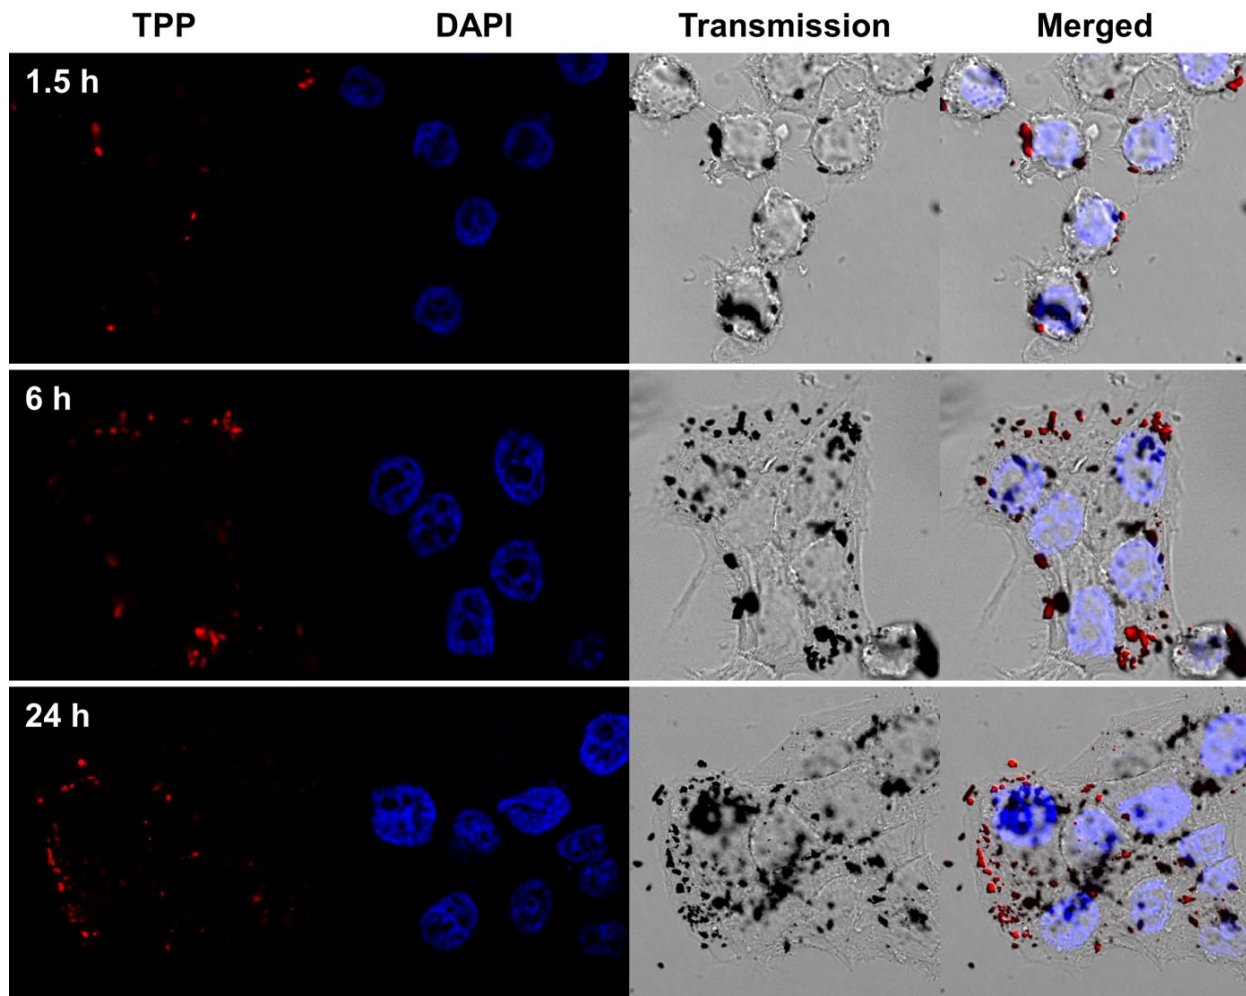

**Figure S5:** SpAcDex(TPP)-FA without FA competition

Supporting Information

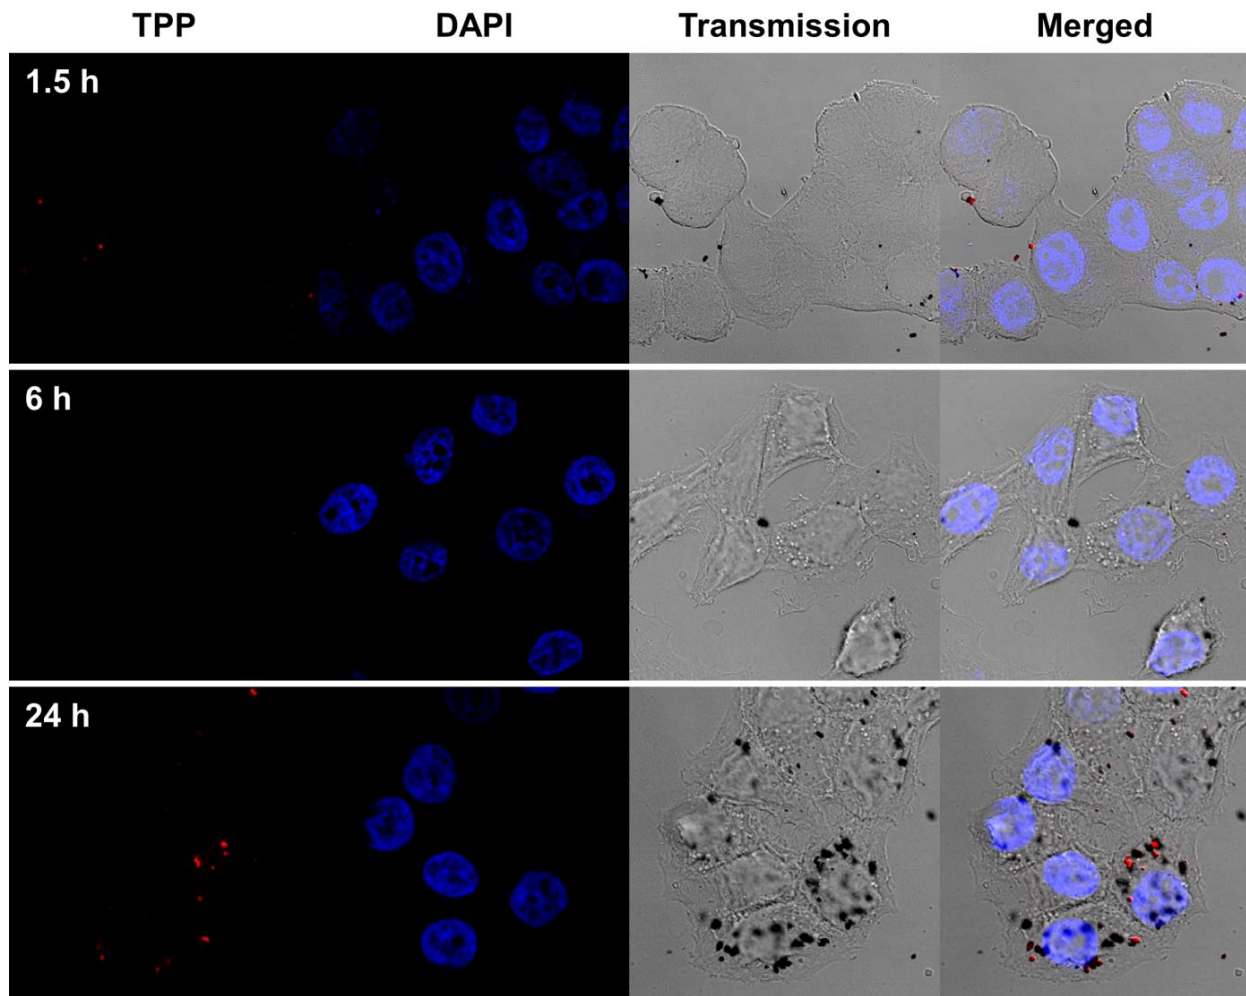

**Figure S6:** SpAcDex(TPP)-FA with FA competition
